# Supplementary material
Source: Royal Society of Chemistry journal article supplement (doi:10.1039/d6ew00099a)
Supplement: d6ew00099a1.pdf [file d6ew00099a1.pdf]

## Supporting Information

### Hydrogel-coated polyamide nanofiltration membranes for seawater ion separation

Nawshad Akther <sup>a,b,1</sup>, Kanchan Sharma <sup>a,1</sup>, Youngwoo Choo <sup>a</sup>, Jaichander Swaminathan <sup>c</sup>,  
Pengfei Zhang <sup>d</sup>, Hideto Matsuyama <sup>d</sup>, Gayathri Naidu <sup>a,\*</sup>

<sup>a</sup> School of Civil and Environmental Engineering, University of Technology Sydney (UTS),  
NSW 2007, Australia

<sup>b</sup> School of Civil Engineering, The University of Sydney, NSW 2006, Australia

<sup>c</sup> Interdisciplinary Centre for Energy Research, IISc Bangalore, Karnataka 560012, India

<sup>d</sup> Research Center for Membrane and Film Technology, Department of Chemical Science and  
Engineering, Kobe University, 1-1 Rokkodaicho, Nada-ku, Kobe 657-8501, Japan

\*Corresponding author(s): Email: Gayathri.Danasamy@uts.edu.au (G. Naidu).

<sup>1</sup> N. Akther and K. Sharma contributed equally to this work.

## S1. X-ray Photoelectron Spectroscopy (XPS) analysis of membrane surface composition

XPS was used to examine the surface chemical composition of the fabricated membranes. As shown in Figure S1, characteristic peaks corresponding to C1s (~285 eV), O1s (~531 eV), and N1s (~399 eV) were observed for the polyamide TFC membrane formed via interfacial polymerization between MPD and TMC on the PES ultrafiltration substrate. Minor peaks corresponding to S2p (~168 eV) and S2s (~229 eV) were also detected, which originate from the sulfone groups of the underlying PES substrate and are consistent with previous reports.

The reduced intensity of sulfur signals (S2p and S2s) indicates effective coverage of the PES substrate by the polyamide selective layer. The presence of the N1s peak at approximately 399 eV confirms the incorporation of amide groups formed during the interfacial polymerization reaction between MPD and TMC. Additionally, the absence of a Cl 2p peak indicates the consumption of the TMC monomer during polyamide formation.

Following the hydrogel coating of the TFC membrane with PVA, the XPS spectra showed an increase in oxygen content, attributed to the hydroxyl functional groups present in the PVA hydrogel. Changes in elemental composition are further reflected in the atomic concentration values summarized in Table S1. These results support the presence of the hydrogel layer on the membrane surface after modification.

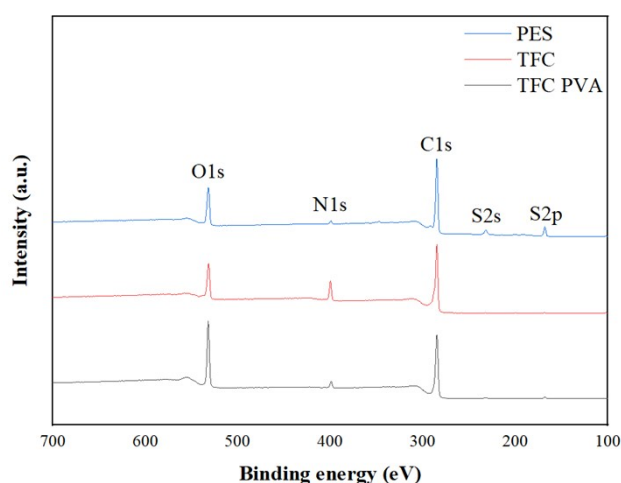

Figure S1: XPS spectra of the PES UF membrane, and fabricated (TFC and TFC PVA) NF membranes.

Table S1: Surface elemental composition and O/N ratios of the PES UF membrane, fabricated (TFC and TFC PVA) composite membrane from XPS analysis.

| Membrane | Atomic percent (%) |      |     |     |     | O/N  |
|----------|--------------------|------|-----|-----|-----|------|
|          | C                  | O    | N   | Cl  | S   |      |
| PES      | 79.2               | 15.1 | 1.5 | 0.1 | 3.8 | 10.1 |
| TFC      | 77.1               | 13.2 | 9.6 | 0.0 | 0.1 | 1.3  |
| TFC PVA  | 74.6               | 21.1 | 3.0 | 0.0 | 1.3 | 7.0  |

## S2. Benchmarking of NF membrane performance

Table S2: Benchmarking of this work against reported nanofiltration membranes.

| Membrane            | Type                              | Feed                            | Pressure (bar) | Flux ( $\text{L m}^{-2} \text{h}^{-1}$ ) | Rejection (%)                                                                                                | Ref        |
|---------------------|-----------------------------------|---------------------------------|----------------|------------------------------------------|--------------------------------------------------------------------------------------------------------------|------------|
| NF270               | Commercial NF                     | Seawater (~35 g/L)              | 4              | 25.5                                     | Na <sup>+</sup> : 8.3<br>Mg <sup>2+</sup> : 38.1                                                             | This study |
| TS80                | Commercial NF                     | Seawater (~35 g/L)              | 4              | 8.3                                      | Na <sup>+</sup> : 10.8<br>Mg <sup>2+</sup> : 49.6                                                            | This study |
| TFC                 | Polyamide TFC NF                  | Seawater (~35 g/L)              | 4              | 10.9                                     | Na <sup>+</sup> : 27.3<br>Mg <sup>2+</sup> : 43.6                                                            | This study |
| TFC-PVA             | Hydrogel-coated TFC NF            | Seawater (~35 g/L)              | 4              | 2.2                                      | Na <sup>+</sup> : 46.1<br>Mg <sup>2+</sup> : 73.2                                                            | This study |
| 1.0:1.0 PSS-PDADMAC | APS-based PEC NF                  | Single salt solution (5mM)      | 4              | 4.0                                      | Na <sub>2</sub> SO <sub>4</sub> : ~20<br>MgCl <sub>2</sub> : ~65                                             | [1]        |
| PSS-PDADMAC         | PEC tubular NF                    | Single salt solution (5mM)      | 3              | 0.3                                      | MgCl <sub>2</sub> : 92.0<br>MgSO <sub>4</sub> : 70.0<br>NaCl: 54.0<br>Na <sub>2</sub> SO <sub>4</sub> : 27.0 | [2]        |
| PQA                 | Positively charged NF             | Single salt solution (1000 ppm) | 10             | 29                                       | MgCl <sub>2</sub> : 97.0<br>NaCl: 69.1<br>MgSO <sub>4</sub> : 29.6<br>Na <sub>2</sub> SO <sub>4</sub> : 20.2 | [3]        |
| XL-PEE              | Cross-linked epoxide-based TFC NF | Single salt solution (5mM)      | 10             | 20                                       | MgCl <sub>2</sub> : 89.0<br>NaCl: 81.0<br>CaCl <sub>2</sub> : 87.0                                           | [4]        |

| Membrane                    | Type                                     | Feed                          | Pressure (bar) | Flux (L m <sup>-2</sup> h <sup>-1</sup> ) | Rejection (%)                                                                                            | Ref |
|-----------------------------|------------------------------------------|-------------------------------|----------------|-------------------------------------------|----------------------------------------------------------------------------------------------------------|-----|
| TBDA-SO <sub>3</sub> (0.1%) | Positively charged TFC NF (PIP/TBDA-TMC) | Single salt solution (2 g/L)  | 10             | 78                                        | MgCl <sub>2</sub> : ~97<br>NaCl: ~50<br>CaCl <sub>2</sub> : ~98<br>Na <sub>2</sub> SO <sub>4</sub> : ~99 | [5] |
| SF-TFC                      | Positively charged TFC NF (DAGH-TMC)     | Single salt solution (0.01 M) | 7              | 31                                        | MgCl <sub>2</sub> : 95.8<br>LiCl: 30.6                                                                   | [6] |

### S3. References

- [1] E.N. Durmaz, J.D. Willott, M.M.H. Mizan, W.M. de Vos, Tuning the charge of polyelectrolyte complex membranes prepared via aqueous phase separation, *Soft Matter*, 17 (2021) 9420-9427.
- [2] S. Emonds, J. Kamp, J. Borowec, H. Roth, M. Wessling, Polyelectrolyte Complex Tubular Membranes via a Salt Dilution Induced Phase Inversion Process, *Adv. Eng. Mater.*, 23 (2021) 2001401.
- [3] S. Jeon, H. Kim, J. Choi, J.F. Kim, H.B. Park, J.-H. Lee, Extreme pH-Resistant, Highly Cation-Selective Poly(Quaternary Ammonium) Membranes Fabricated via Menshutkin Reaction-Based Interfacial Polymerization, *Adv. Funct. Mater.*, 33 (2023) 2300183.
- [4] R. Verbeke, D.M. Davenport, T. Stassin, S. Eyley, M. Dickmann, A.J. Cruz, P. Dara, C.L. Ritt, C. Bogaerts, W. Egger, R. Ameloot, J. Meersschaut, W. Thielemans, G. Koeckelberghs, M. Elimelech, I.F.J. Vankelecom, Chlorine-Resistant Epoxide-Based Membranes for Sustainable Water Desalination, *Environmental Science & Technology Letters*, 8 (2021) 818-824.
- [5] J. Zhou, Z. Liu, C. Jiang, Y. Hou, Preparation of highly selective nanofiltration composite membranes based on a novel soluble rigidly contorted monomer, *J. Appl. Polym. Sci.*, 141 (2024) e55141.
- [6] S. Zhang, C. Luo, X. Li, W. Zhang, K. Jing, L. Lin, Z. Qiao, J. Xu, F. Yan, D. Wan, J. Pan, Thin film composite membranes prepared from diaminoguanidine hydrochloride for Mg<sup>2+</sup>/Li<sup>+</sup> separation, *Appl. Surf. Sci.*, 635 (2023) 157605.
